# Supplementary material
Source: PubMed Central journal article supplement (PMC6675635)
Supplement: NIHMS1040607-supplement-Supplemental_Table_1.pdf [file NIHMS1040607-supplement-Supplemental_Table_1.pdf]

Supplemental Table 1

*Bivariate associations among residualized neurophysiological variables and psychiatric symptoms in adolescents and young adults with Borderline Personality Disorder (n = 33)*

|                    | 1. | 2.            | 3.    | 4.             | 5.   | 6.             | 7.            | 8.            | 9.            | 10.           |
|--------------------|----|---------------|-------|----------------|------|----------------|---------------|---------------|---------------|---------------|
| 1. RewP            | -- | <b>0.46**</b> | -0.08 | 0.24           | 0.04 | -0.13          | -0.20         | -0.21         | 0.002         | -0.10         |
| 2. P300            |    | --            | -0.05 | 0.10           | 0.26 | -0.15          | <b>-0.42*</b> | -0.21         | -0.26         | 0.18          |
| 3. Theta (wins)    |    |               | --    | <b>0.65***</b> | 0.11 | 0.23           | -0.11         | 0.06          | -0.07         | 0.20          |
| 4. Theta (losses)  |    |               |       | --             | 0.16 | 0.28           | -0.18         | -0.11         | 0.13          | -0.08         |
| 5. Delta (wins)    |    |               |       |                | --   | <b>0.72***</b> | -0.13         | -0.22         | -0.08         | 0.04          |
| 6. Delta (losses)  |    |               |       |                |      | --             | -0.02         | -0.07         | 0.17          | -0.07         |
| 7. BPD Symptoms    |    |               |       |                |      |                | --            | <b>0.54**</b> | <b>0.45**</b> | -0.09         |
| 8. Depression      |    |               |       |                |      |                |               | --            | <b>0.34^</b>  | <b>0.46**</b> |
| 9. Anxious Arousal |    |               |       |                |      |                |               |               | --            | -0.18         |
| 10. Anhedonia      |    |               |       |                |      |                |               |               |               | --            |

*Note.*  $\wedge p = 0.067$ ; \*  $p < 0.050$ ; \*\*  $p < 0.010$ ; \*\*\*  $p < 0.001$ . RewP = Reward Positivity; BPD = Borderline Personality Disorder. The RewP and P300 are standardized residuals computed by regressing losses onto wins.
